# Supplementary material for: Electrospun nitrogen and carbon co-doped porous TiO2 nanofibers with high visible light photocatalytic activity
Source: Royal Society of Chemistry journal article supplement (doi:10.1039/c5nj01333j), 2015-01-01
Supplement: c5nj01333j1.pdf [file c5nj01333j1.pdf]

## Supplementary Information

### Electrospun nitrogen and carbon co-doped porous TiO<sub>2</sub> nanofibers with high visible light photocatalytic activity

Xinping Liu<sup>1,2</sup>, Yanying Chen<sup>1,3</sup>, Changlin Cao<sup>2,3</sup>, Jing Xu<sup>1,3</sup>, Qingrong Qian<sup>1,3\*</sup>,  
Yongjin Luo<sup>1,3</sup>, Hun Xue<sup>1,3</sup>, Liren Xiao<sup>2</sup>, Yuming Chen<sup>1,3</sup>, Qinghua Chen<sup>1,3\*</sup>

<sup>1</sup> College of Environmental Science and Engineering, <sup>2</sup> College of Materials Science and Engineering, Fujian Normal University, Fuzhou 350007, China

<sup>3</sup> Fujian Key Laboratory of Pollution Control & Resource Reuse, Fuzhou 350007, China

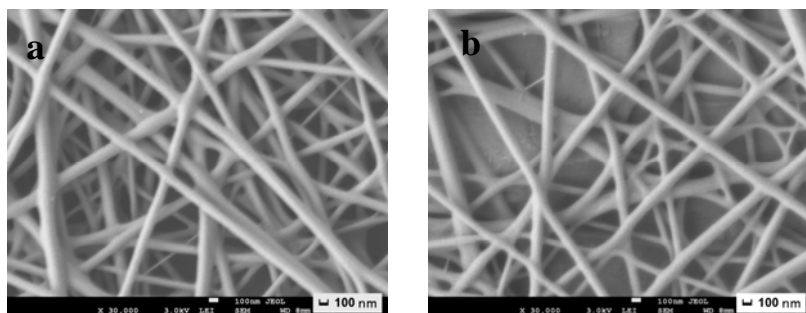

**Fig.S1** FESEM images of the PVP/Ti(OiPr)<sub>4</sub> (a)  
and the PVP/Ti(OiPr)<sub>4</sub>/5 wt% Urea (b)

---

\* Corresponding authors. Tel. & Fax: +86-591 8346 5158  
[qrqian@fjnu.edu.cn](mailto:qrqian@fjnu.edu.cn) (Q. Qian), [cqhuar@fjnu.edu.cn](mailto:cqhuar@fjnu.edu.cn) (Q. Chen)

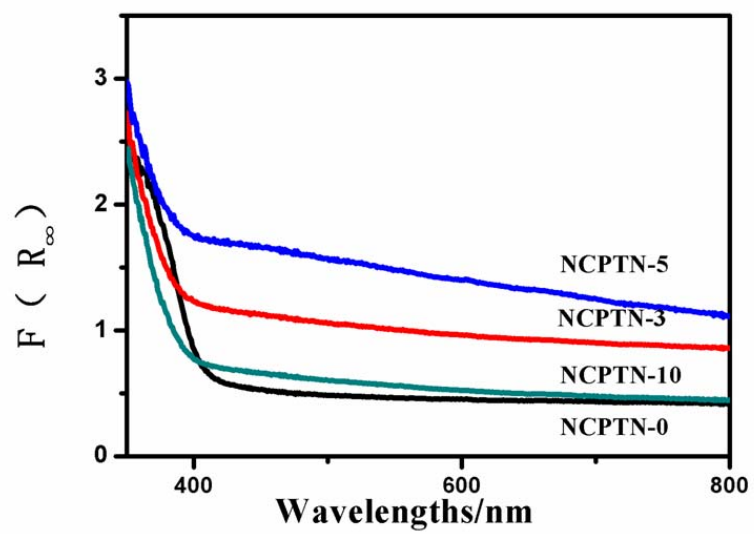

**Fig.S2** The diffuse reflectance spectra for NCPTNs

**Table S1 The atomic percentage of C, N, Ti and O in NCPTNs  
calculated from peak area of XPS spectra**

| <b>Name</b> | <b>NCPTN-0<br/>Atomic %</b> | <b>NCPTN-5<br/>Atomic %</b> |
|-------------|-----------------------------|-----------------------------|
| <b>C1s</b>  | <b>16.73</b>                | <b>17.35</b>                |
| <b>N1s</b>  | <b>0.46</b>                 | <b>0.48</b>                 |
| <b>Ti2p</b> | <b>26.43</b>                | <b>26.24</b>                |
| <b>O1s</b>  | <b>56.37</b>                | <b>55.92</b>                |

**Table S2 The BET surface area for NCPTNs**

| <b>Samples</b>  | <b>a<sub>s</sub>, BET/m<sup>2</sup>/g</b> |
|-----------------|-------------------------------------------|
| <b>NCPTN-0</b>  | <b>83.19</b>                              |
| <b>NCPTN-5</b>  | <b>114.41</b>                             |
| <b>NCPTN-10</b> | <b>100.58</b>                             |
